# Supplementary material
Source: Springer Nature journal article supplement (https://www.springermedizin.de/resource/supplementary/12879_2008_768_MOESM4_ESM.pdf/9449798)
Supplement: MOESM4 [file 9449798]

HFMD,  
N=730

Presented on  
1<sup>st</sup> 2 days of illness  
N=579

Presented on 3<sup>rd</sup> or  
later day of illness  
N=151

Had 2 risk factors  
(Hx lethargy PLUS  
temp  $\geq 38.5^{\circ}\text{C}$ )  
N=65

Had 1 risk factor  
(Hx lethargy OR  
temp  $\geq 38.5^{\circ}\text{C}$ )  
N=220

Had neither  
Hx lethargy nor  
temp  $\geq 38.5^{\circ}\text{C}$   
N=294

Had 3 risk factors  
(Had fever  $\geq 3\text{D}$  PLUS  
Hx lethargy PLUS  
temp  $\geq 38.5^{\circ}\text{C}$ )  
N=22

Had 2 of the 3 risk  
factors (Had fever  $\geq 3\text{D}$   
PLUS Hx lethargy OR  
temp  $\geq 38.5^{\circ}\text{C}$ )  
N=55

Had 1 risk factor  
(Had only  
fever  $\geq 3\text{D}$ )  
N=74

\*Had CSF exam?

NO  
N=2  
Mild  
HFMD  
N=2

NO  
N=53  
Mild  
HFMD  
N=53

NO  
N=210  
Mild  
HFMD  
N=210

NO  
N=0  
Mild  
HFMD  
N=0

NO  
N=1  
Mild  
HFMD  
N=1

NO  
N=28  
Mild  
HFMD  
N=28

YES  
N=63

YES  
N=167

YES  
N=84

YES  
N=22

YES  
N=54

YES  
N=46

Had >5 cells/ $\mu\text{L}$ ?

YES NO

YES NO

YES NO

YES NO

YES NO

YES NO

HFMD  
-CNS  
N=48<sup>a</sup>    HFMD  
-Non-  
CNS  
N=15

HFMD  
-CNS  
N=102<sup>b</sup>    HFMD  
-Non-  
CNS  
N=65

HFMD  
-CNS  
N=24<sup>c</sup>    HFMD  
-Non-  
CNS  
N=60

HFMD  
-CNS  
N=17<sup>d</sup>    HFMD  
-Non-  
CNS  
N=5

HFMD  
-CNS  
N=40<sup>e</sup>    HFMD  
-Non-  
CNS  
N=14

HFMD  
-CNS  
N=19<sup>f</sup>    HFMD  
-Non-  
CNS  
N=27
